# Supplementary material
Source: PubMed Central journal article supplement (PMC6163063)
Supplement: NIHMS961753-supplement-supplement_1.pdf [file NIHMS961753-supplement-supplement_1.pdf]

423  
424  
425

**Appendix:**

**Supplemental Figure S1. Pre-ASCT Lymphopenia Compared Between TBC and BEAM**

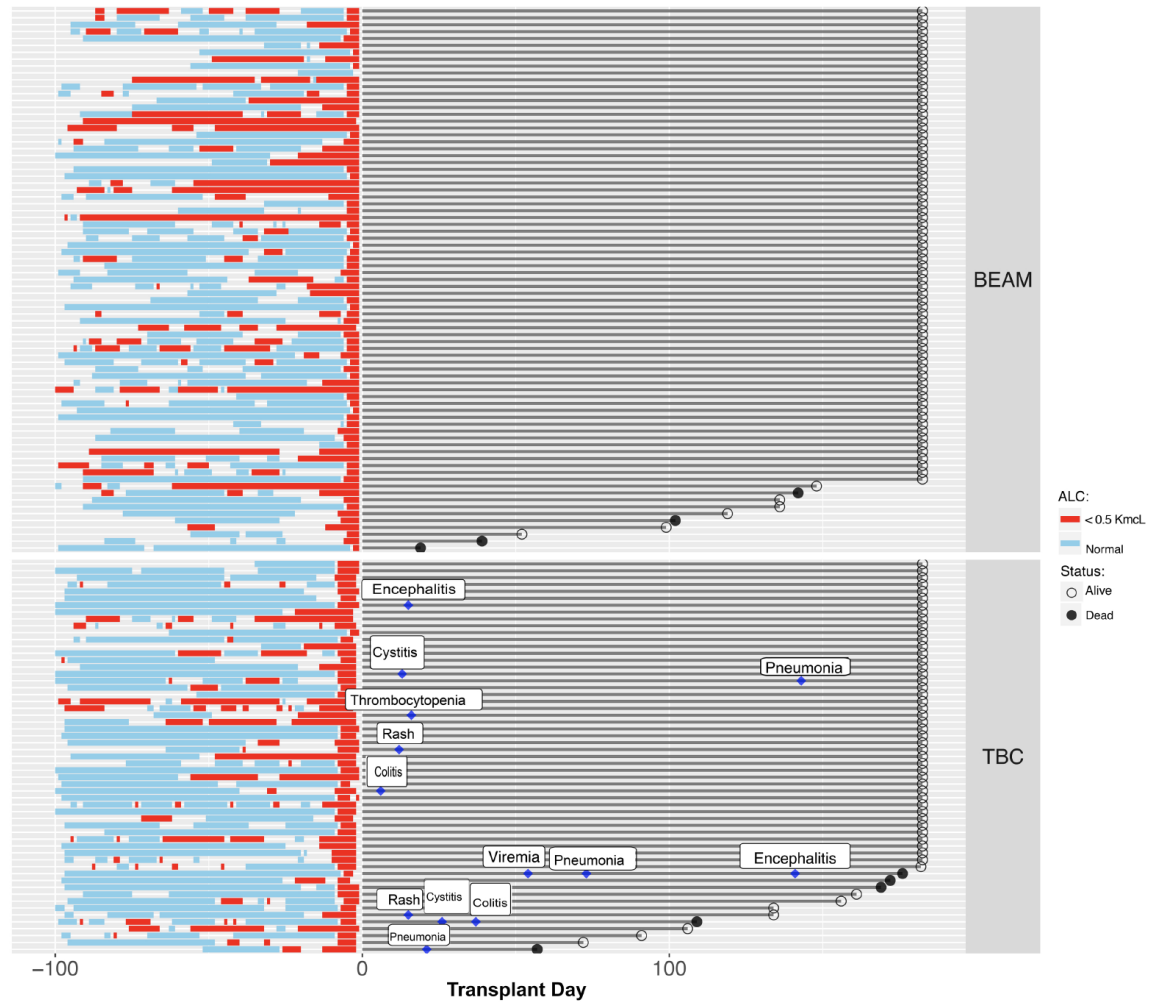

426  
427  
428  
429  
430  
431  
432  
433  
434  
435

The degree of lymphopenia before ASCT (before day 0) is compared between TBC-ASCT and BEAM-ASCT patients. Lymphopenia is defined as a single patient having at least one 14-day period with an ALC below 0.5 K/mL. There was no significant difference between the groups ( $p=0.84$ )

436 **Supplemental Figure S2. Post-ASCT Steroid Use Compared Between TBC and BEAM**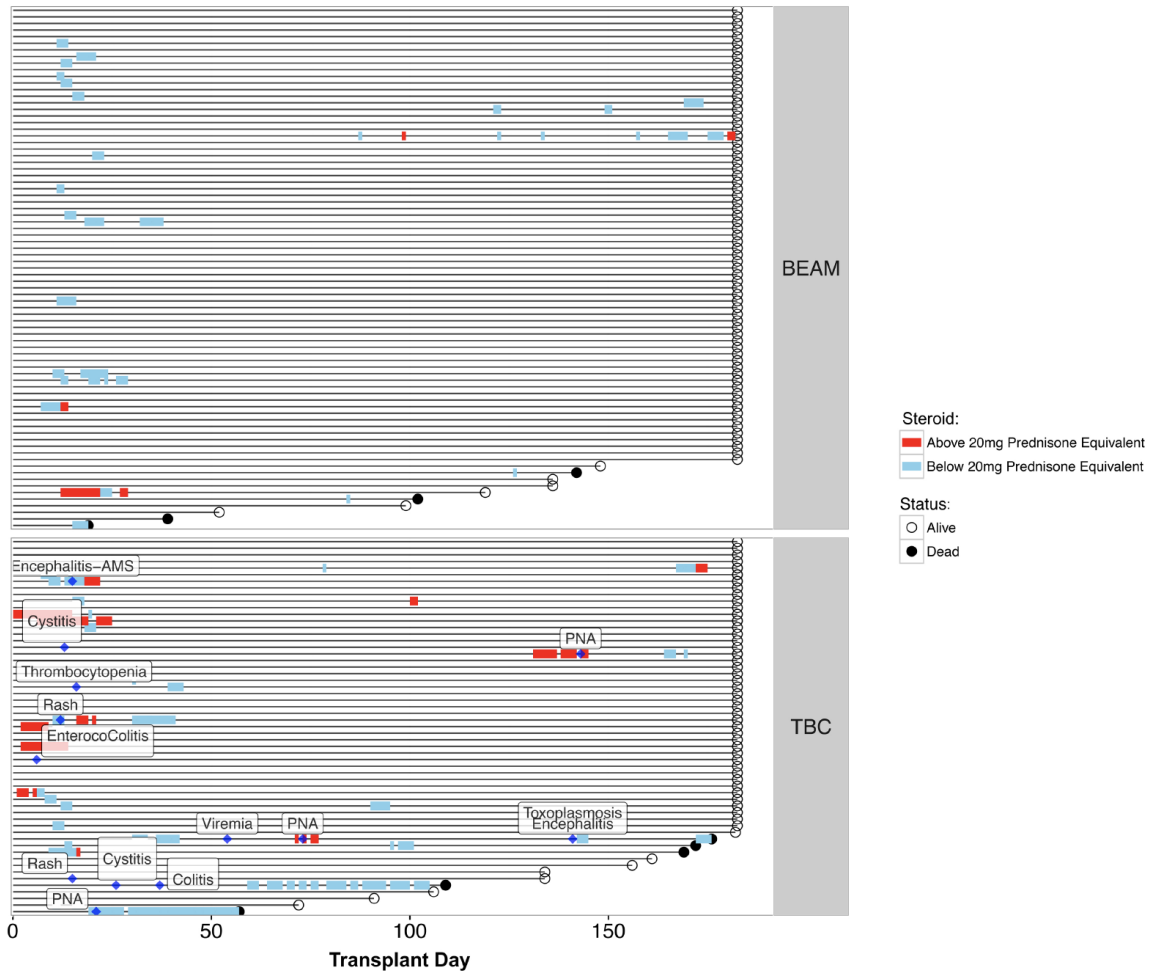

437  
 438  
 439  
 440  
 441  
 442  
 443  
 444  
 445  
 446

Corticosteroid exposure was compared between TBC-ASCT and BEAM-ASCT patients from day 0 to 180. Corticosteroid use was defined as having received equivalent doses of prednisone 20 mg with first dose greater than or equal to 20 mg treated as a time dependent variable.

447 **Supplemental Figure S3.** Cumulative Incidence of Bloodstream Infections Compared  
 448 Between TBC and BEAM  
 449

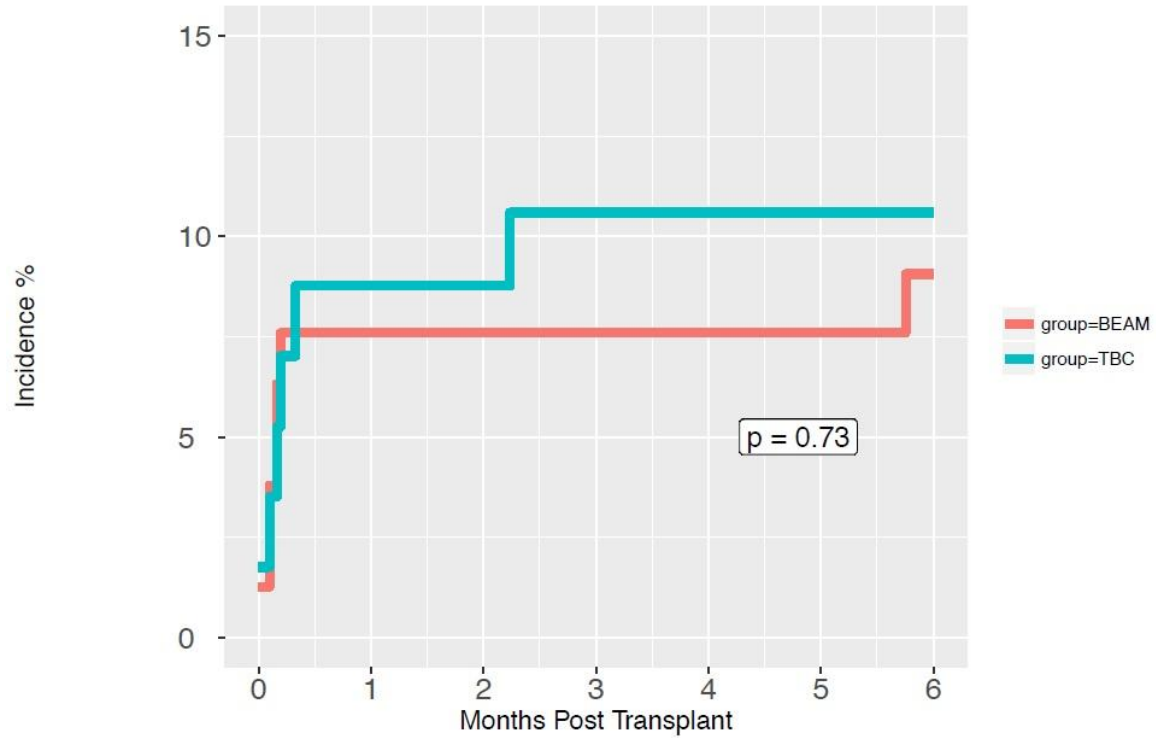

|            |    |    |    |    |    |    |    |
|------------|----|----|----|----|----|----|----|
| group=TBC  | 57 | 53 | 51 | 47 | 44 | 39 | 34 |
| group=BEAM | 79 | 73 | 71 | 71 | 68 | 64 | 62 |

450  
 451  
 452  
 453  
 454  
 455  
 456  
 457  
 458

Non-coagulase negative *Staphylococcus aureus* bloodstream infections (BSIs) were compared between TBC-ASCT and BEAM-ASCT patients with no significant difference noted.

459 **Supplemental Table S1.** Types of Non-Coagulase Negative Staphylococcus aureus  
460 Infections Compared Between TBC and BEAM

| Organism                     | BEAM | TBC |
|------------------------------|------|-----|
| Escherichia coli             | 3    | 4   |
| Streptococcus viridans       | 2    | 0   |
| Klebsiella pneumoniae        | 1    | 1   |
| Bacillus spp.                | 1    | 0   |
| Lactobacillus rhamnosus      | 0    | 1   |
| Staphylococcus aureus (MSSA) | 1    | 0   |
| Candida krusei               | 0    | 1   |
| TOTALS                       | 9    | 7   |

461  
462  
463

Accepted Manuscript
